# Supplementary material for: Novel glyconanoconjugates: synthesis, characterization and bioapplications
Source: Royal Society of Chemistry journal article supplement (doi:10.1039/c6ra21976d), 2016-01-01
Supplement: c6ra21976d1.pdf [file c6ra21976d1.pdf]

## Supplementary Information

### Novel Glyconanoconjugates: Synthesis, Characterization and Bioapplications

*Fatma Cetin Telli<sup>a</sup>, Bilal Demir<sup>b</sup>, Fırat Baris Barlas<sup>b</sup>, Emine Guler<sup>b,c</sup>, Suna Timur<sup>b,c</sup> and  
Yesim Salman<sup>a,\*</sup>*

<sup>a</sup>Ege University, Faculty of Science, Chemistry Department, 35100 Bornova, Izmir/Turkey.

<sup>b</sup>Ege University, Faculty of Science, Biochemistry Department, 35100 Bornova,  
Izmir/Turkey.

<sup>c</sup>Ege University, Institute of Drug Abuse Toxicology&Pharmaceutical Sciences, 35100  
Bornova, Izmir/Turkey

## Figure of Contents

|                                                                                                  |    |
|--------------------------------------------------------------------------------------------------|----|
| <b>Fig. S1.</b> Structure of Schiff base ligand (1) from aminochloralose derivative of galactose | P3 |
| <b>Fig. S2.</b> XPS Spectra of AgNPs conjugated with the sugar schiff base ligand (1)            | P4 |
| <b>Fig. S3.</b> XPS Spectra of AuNPs conjugated with the sugar schiff base ligand (1)            | P5 |

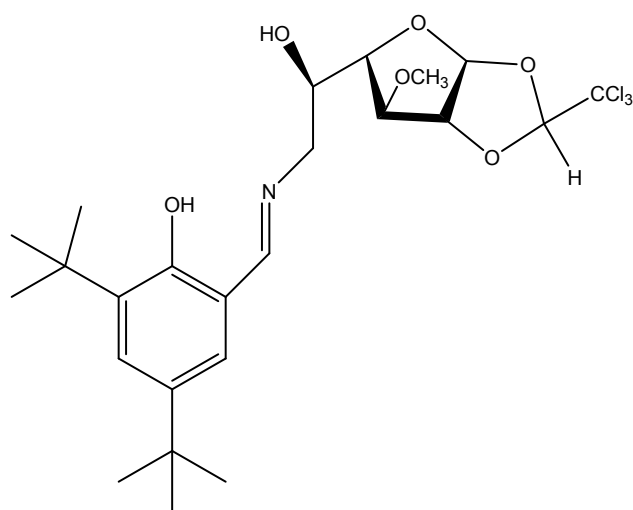

**Fig. S1.** Structure of Schiff base ligand (1) from aminochloralose derivative of galactose.

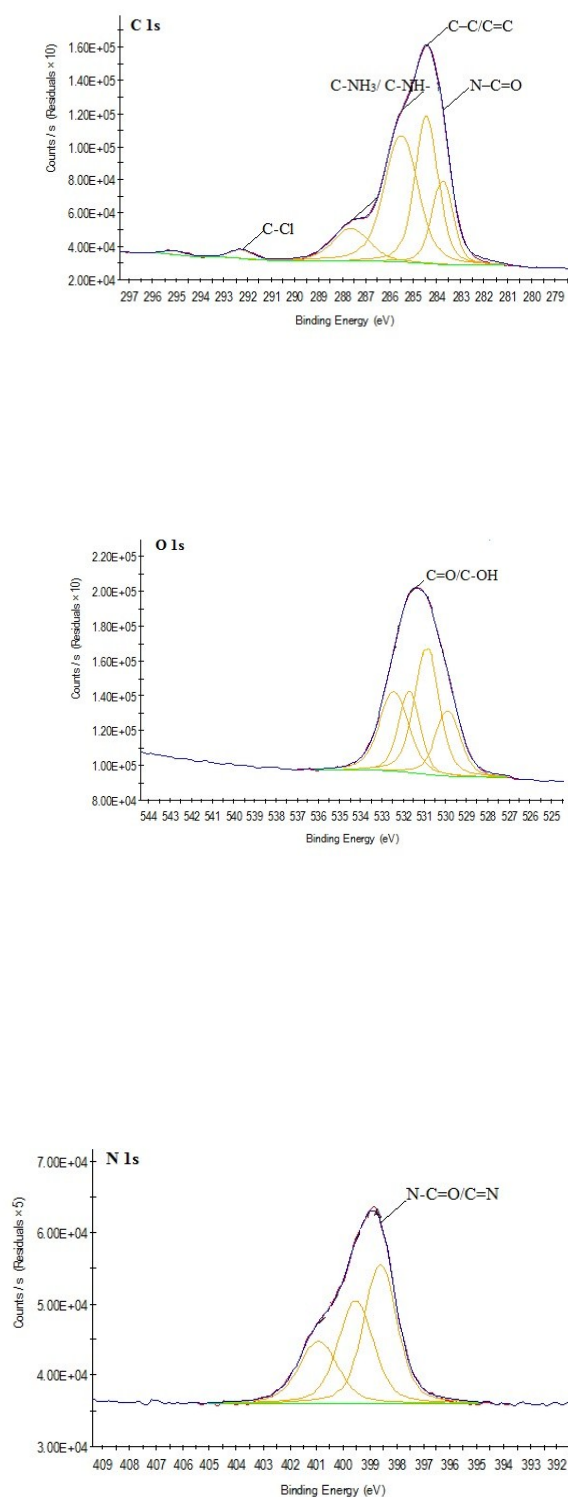

**Fig. S2.** XPS Spectra of AgNPs conjugated with the sugar schiff base ligand (1)

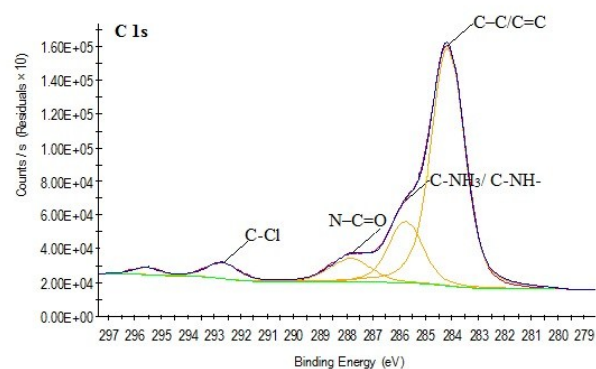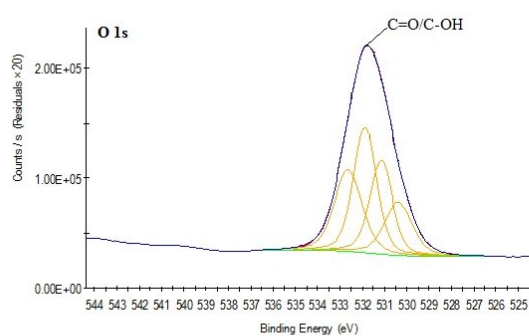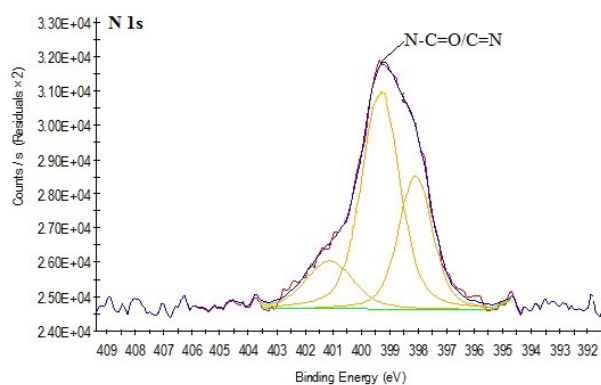

**Fig. S3.** XPS Spectra of AuNPs conjugated with the sugar schiff base ligand (**1**)
